# Supplementary material
Source: PubMed Central journal article supplement (PMC6640917)
Supplement: ao7b00382_si_001.pdf [file ao7b00382_si_001.pdf]

## SUPPORTING INFORMATION

**Fabrication of core-shell structured organic-inorganic hybrid nanocatalyst for the expedient synthesis of Polysubstituted Oxazoles *via* tandem oxidative cyclization pathway**

*Sriparna Dutta,<sup>†</sup> Shivani Sharma,<sup>†</sup> Aditi Sharma<sup>†</sup> and Rakesh K. Sharma<sup>\*,†</sup>*

<sup>†</sup>Green Chemistry Network Centre, Department of Chemistry, University of Delhi, New Delhi-110007, India. Fax: +91-011-27666250; Tel: 011-276666250 Email: rksharmagreenchem@hotmail.com

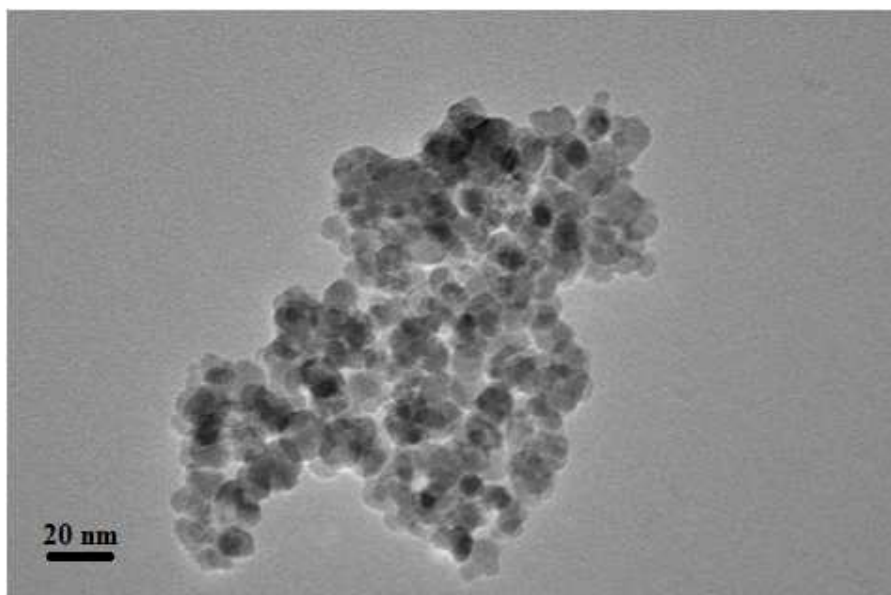

**Figure S1.** TEM image of the final Cu-BPy@Am-SiO<sub>2</sub>@Fe<sub>3</sub>O<sub>4</sub> nanocatalyst.

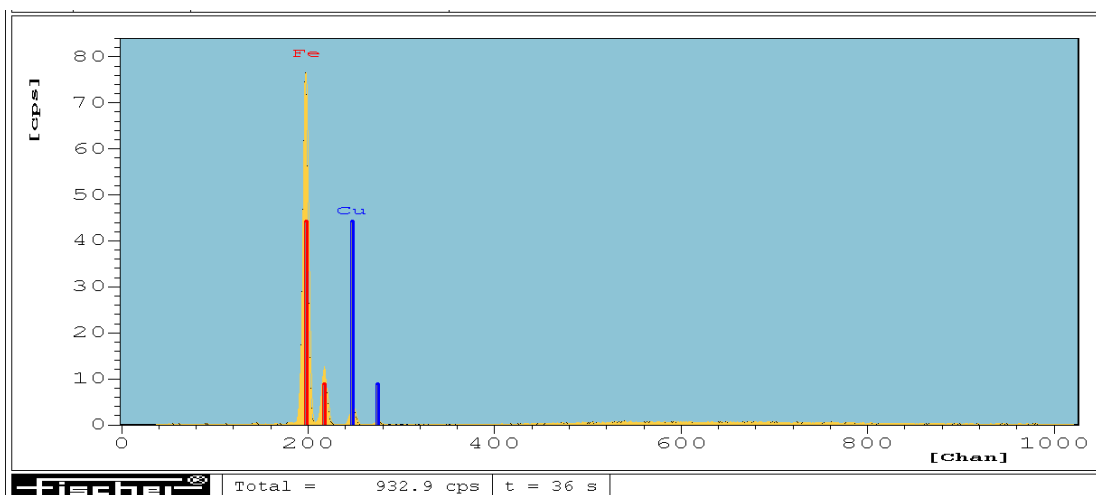

**Figure S2.** ED-XRF spectrum of the Cu-BPy@Am-SiO<sub>2</sub>@Fe<sub>3</sub>O<sub>4</sub> nanocatalyst.

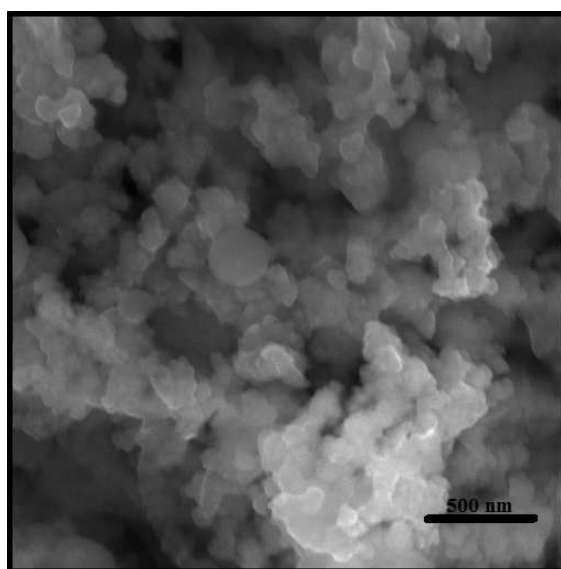

**Figure S3.** SEM image of the recovered Cu-BPy@Am-SiO<sub>2</sub>@Fe<sub>3</sub>O<sub>4</sub> nanocatalyst (obtained after 8 runs).

**Table S1.** Influence of additives on tandem oxidative cyclization of amines and 1,3 dicarbonyls

| Entry | Additive       | Conversion % <sup>[b]</sup> | TON <sup>[c]</sup> | TOF <sup>[d]</sup> |
|-------|----------------|-----------------------------|--------------------|--------------------|
| 1.    | No additive    | 48                          | 187                | 62                 |
| 2.    | NIS            | 75                          | 295                | 148                |
| 3.    | I <sub>2</sub> | 100                         | 393                | 197                |
| 4.    | KI             | 55                          | 216                | 72                 |
| 5.    | TBAI           | 52                          | 204                | 68                 |
| 6.    | NBS            | 50                          | 196                | 65                 |

[a] Reaction conditions: Methylacetoacetate (1 mmol), benzylamine (2 mmol), Cu-BPy@Am-SiO<sub>2</sub>@Fe<sub>3</sub>O<sub>4</sub> catalyst (30 mg), H<sub>2</sub>O<sub>2</sub> (2 mmol), additive (1.2 mmol), DMF (3 mL), 3h; [b] Conversion percentages determined *via* GC-MS, [c] TON is the number of moles of product per mol of catalyst, [d] TOF=TON/hour

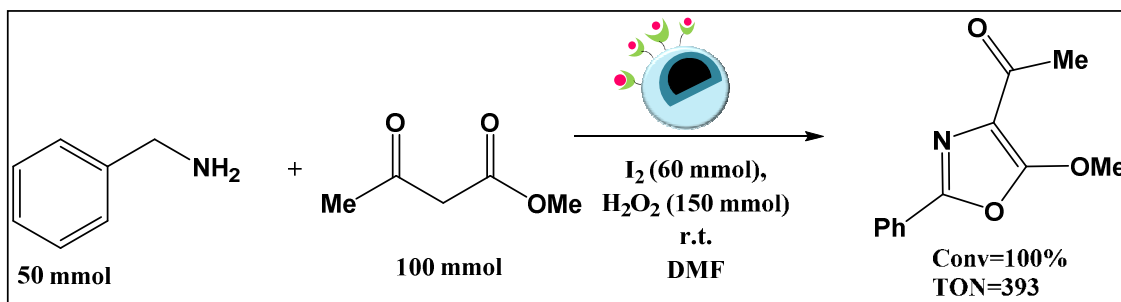

**Scheme S1.** Scale-up synthesis of product 3a.

**Table S2.** Comparison with the earlier reports on TOC approach for oxazole synthesis

| Entry | 1,3-dicarbonyl compound | Benzylamine | Reaction conditions                                                                                                                 | Isolated Yield% | Ref       |
|-------|-------------------------|-------------|-------------------------------------------------------------------------------------------------------------------------------------|-----------------|-----------|
| 1.    |                         |             | Cu(OAc) <sub>2</sub> ·H <sub>2</sub> O, I <sub>2</sub> , TBHP, rt, DMF                                                              | 79              | 11        |
| 2.    |                         |             | Cu(OAc) <sub>2</sub> ·H <sub>2</sub> O, I <sub>2</sub> , TBHP, rt, DMF                                                              | 76              | 11        |
| 3.    |                         |             | Electrolysis, rt                                                                                                                    | 87              | 14        |
| 4.    |                         |             | Electrolysis, rt                                                                                                                    | 85              | 14        |
| 5.    |                         |             | Cu-BPy@Am-SiO <sub>2</sub> @Fe <sub>3</sub> O <sub>4</sub> nanocatalyst, I <sub>2</sub> , H <sub>2</sub> O <sub>2</sub> , r.t., DMF | 89              | This work |
| 6.    |                         |             | Cu-BPy@Am-SiO <sub>2</sub> @Fe <sub>3</sub> O <sub>4</sub> nanocatalyst, I <sub>2</sub> , H <sub>2</sub> O <sub>2</sub> , r.t., DMF | 86              | This work |
